# Supplementary material
Source: MDPI journal article supplement (https://www.mdpi.com/search?q=ijerph-16-03207)
Supplement: s001 [file ijerph-16-03207-s001.pdf]

# Polymorphisms in *PCSK9*, *LDLR*, *BCMO1*, *SLC12A3*, *KCNJ1* are associated with Serum Lipid Profile in Chinese Han Population

Zheng Li,<sup>1,\*</sup> Tian-Yu Zhao,<sup>1,2,\*</sup> Xiao-Hua Tan,<sup>1</sup> Song Lei,<sup>1,2</sup> Liu Huang,<sup>1</sup> and Lei Yang<sup>1</sup>

<sup>1</sup> Medical School, Hangzhou Normal University, Hangzhou 310000, Zhejiang, China.

<sup>2</sup> Medical School, Shihezi University, Shihezi 832000, Xinjiang, China.

\* These authors contributed equally to this work.

**Corresponding author:** Lei Yang, Medical School, Hangzhou Normal University, 2318 Yuhangtang Rd, Hangzhou, Zhejiang, China. Tel: +86-05-712-8865-010, yanglei62@hznu.edu.cn

## Supplementary Materials

**Table S1.** The sequences of primers and probes for PCR-LDR.

| SNPs       | primers                  | probes                                                                                               |
|------------|--------------------------|------------------------------------------------------------------------------------------------------|
| rs12934922 | F AAGCTACTACCACAGCTTTGG  | A: GATGGCAACCGCATAACATCCGGAGA                                                                        |
|            | R TTGCCTTAAACTTCACCCTCC  | T: TTTGATGGCAACCGCATAACATCCGGAGT<br>R: -P-ATGAGCTGGGCTCCTGCCTGGCTT-FAM-                              |
| rs2479409  | F GCTCTCTTCCCTTTTCATC    | A: TTTTTTTTTTTTGAATTCTGAATGTACCTATATGACA                                                             |
|            | R CCAGCCTACATGCATTTC AAG | G: TTTTTTTTTTTTTTTGAATTCTGAATGTACCTATATGACG<br>R: -P-TCCTTGGCAAACCTAAAACCTGAATCTTTTTTTTTT-FAM-       |
| rs662145   | F TGAGTGTGAAAGGTGCTGATG  | C: TTTTTTTTTTTTTTTCTAGCCAGAGGCTGGAGACAGGTGC                                                          |
|            | R TAGAGCAGAGTAAAGGTGGCT  | T: TTTTTTTTTTTTTTTTTTTCTAGCCAGAGGCTGGAGACAGGTGT<br>R: -P-GCCCCTGGTGGTCACAGGCTGTGCCTTTTTTTTTTTTT-FAM- |
| rs2738466  | F ACCGAGACCAAACCTCATTAC  | A: TTTTTGTCAGGACACCAGCCTGGTGCCCA                                                                     |
|            | R CTGAACTGAGAAAGTGCAAGG  | G: TTTTTTTGTCAGGACACCAGCCTGGTGCCCCG<br>R: -P-TCCTCCCAGCCCCTACCCACTTCCATTT-FAM-                       |
| rs1003723  | F AATCTACTGGTCTGACCTGTC  | C: TTTTTTTTCGCAGGTGAGATGAGGGCTCCTGGC                                                                 |
|            | R TAGATGTTGCTGTGGATCCAG  | T: TTTTTTTTTTTTCGCAGGTGAGATGAGGGCTCCTGGT<br>R: -P-GCTGATGCCCTTCTCTCCTCCTGCCTTTTTT-FAM-               |
| rs6413504  | F ACTTTGGCTTTTGCCCTGAGAG | A: TTTTTTTTTTTTGTGGCCTCCAGCCGTGTTTCTGAA                                                              |
|            | R TCATCCTCCAGACTGACCATC  | G: TTTTTTTTTTTTTTTGTGGCCTCCAGCCGTGTTTCTGAG<br>R: -P-TGCTGGACTGATAGTTTCCGCTGTTTTTTTTTTTTT-FAM-        |
| rs11643718 | F AGAATTGCTTGAACCTGGGAG  | A: TCCCTGACATCAACCAGAACCCTCA                                                                         |
|            | R AGGCACACAGTTGGCCCTTCT  | G: TTTTCCCTGACATCAACCAGAACCCTCG<br>R: -P-GGCTGAGCAGTAAGTTCTGTTTTTGG-FAM-                             |

|           |                         |                                                 |
|-----------|-------------------------|-------------------------------------------------|
| rs675759  | F CTAAAAGGGACCAGCTTATGG | C: TTTTTTTTCTGGAAAAAACTGGTACTCAAAGC             |
|           | R GGAACCTGACTCAGTTAATGC | G: TTTTTTTTTTCTGGAAAAAACTGGTACTCAAAGG           |
|           |                         | R: -P-TGCTTAGGAATCAAAATGTTTTCAGTTTTTT-FAM-      |
| rs675388  | F CTAAAAGGGACCAGCTTATGG | C: TTTTTTTTTTTTTTTTTTCAGATCCCCACCTGCATCATTCC    |
|           | R GGAACCTGACTCAGTTAATGC | T: TTTTTTTTTTTTTTTTTTCAGATCCCCACCTGCATCATTCT    |
|           |                         | R: -P-GAATGTGTCCTGGAAAAAACTGGTACTCTTTTTTTT-FAM- |
| rs2846679 | F CCCAGAAGATGAGTGAATTCC | A: TTTTTTTTTTGTCTAAGGCAGGAGGGAAAAGGAAA          |
|           | R ACTTCCCTGGGTCTTGAGAAG | G: TTTTTTTTTTTTTTGTCTAAGGCAGGAGGGAAAAGGAAG      |
|           |                         | R: -P-GAAGTCTGGGGGAAAAGGCTGGCCCTTTTTTTTT-FAM-   |

---
